# Supplementary material for: Intravenous Nicotinamide Riboside Administration Has a Cardioprotective Effect in Chronic Doxorubicin-Induced Cardiomyopathy
Source: MDPI journal article supplement (doi:10.3390/ijms232113096), 2022-10-28
Supplement: s1 [file s1]

Table S1. Quantitative parameters of hematological analysis.

| Time                           | Groups               |                      |                      |                       |
|--------------------------------|----------------------|----------------------|----------------------|-----------------------|
|                                | Control              | DOX                  | NR+DOX               | NR/NR+DOX             |
| <b>WBC, 10<sup>9</sup> g/l</b> |                      |                      |                      |                       |
| Start                          | 8,4 [8,2; 8,9]       | 8,3 [7,8; 8,9]       | 10,2 [8,9; 11,8]     | 8,7 [5,1; 14,8]       |
| End of injection               | 9,3 [6,9; 11,9]      | 10,4 [8,5; 12,3]#    | 9,1 [6,8; 10,8]      | 6,6 [4,9; 6,9]        |
| 1st month                      | 10.1 [8.7; 11.3]     | 11.4 [10.1; 12.1]#   | 10.6 [8.7; 11.4]     | 8.9 [7.1; 10.1]       |
| 2nd month                      | 9.4 [8.5; 11.1]      | 8.7 [7.1; 11.2]      | 9.7 [8.1; 10.7]      | 9.2 [6.6; 10.8]       |
| <b>LYM, 10<sup>9</sup> g/l</b> |                      |                      |                      |                       |
| Start                          | 6,5 [4,9; 7,7]       | 4,8 [4,8; 5,6]       | 5,9 [5,1; 7,7]       | 5,5 [4,1; 10,9]       |
| End of injection               | 7,6 [4,7; 8,1]       | 6,5 [5,6; 7,7] #     | 5,7 [4,5; 7,1]       | 3,8 [3,3; 4,8]*       |
| 1st month                      | 6.4 [5.7; 7.1]       | 7.8 [6.4; 8.6]       | 7.2 [5.8; 8.1]       | 5.9 [5.4; 6.35]       |
| 2nd month                      | 6.8 [5.1; 7.6]       | 5.7 [4.3; 6.9]       | 6.1 [4.5; 7.7]       | 5.1 [4.1; 6.7]        |
| <b>GRA, 10<sup>9</sup> g/l</b> |                      |                      |                      |                       |
| Start                          | 2,2 [1,7; 3,2]       | 2,4 [2,1; 3,5]       | 2,8 [2,4; 3,3]       | 2,5 [1,1; 3,2]        |
| End of injection               | 2,8 [1,1; 3,8]       | 2,8 [1,9; 4,3]       | 2,6 [2,1; 3,3]       | 1,8 [0,9; 2,5]        |
| 1st month                      | 2.2 [1.6; 3.5]       | 2.9 [2.6; 3.4]       | 2.7 [2.2; 3.3]       | 2.1 [1.4; 3.1]        |
| 2nd month                      | 2.4 [1.7; 3.7]       | 2.3 [1.9; 4.3]       | 2.6 [1.7; 4.2]       | 2.5 [1.7; 3.1]        |
| <b>MI%</b>                     |                      |                      |                      |                       |
| Start                          | 5,9 [2,1; 10,9]      | 12,8 [3,5; 13,8]     | 11,8 [9,5; 13]       | 10,2 [5,1; 11,5]      |
| End of injection               | 2.4[1.0;6.7]         | 2.4[0.7; 6.1]        | 1.9[0.6; 6.3]        | 2.9 [0.7; 10.6]       |
| 1st month                      | 7.1 [4.3; 10.2]      | 5.0 [3.6; 9.3]       | 4.2 [0.8; 8.1]       | 6.3 [2.2; 11.5]       |
| 2nd month                      | 6.1 [4.9; 7.6]       | 4.2 [1.3; 6.5]       | 6.5 [4.2; 8.2]       | 5.8 [2.9; 6.9]        |
| <b>RBC, 10<sup>12</sup>/l</b>  |                      |                      |                      |                       |
| Start                          | 7,8 [7,4; 8,4]       | 8,1 [7,8; 8,3]       | 8,1 [7,8; 8,4]       | 7,9 [7,3; 8,2]        |
| End of injection               | 8.8 [7.6; 9.1]       | 7.8 [7.6; 8.7]       | 7.7 [7.4; 7.9]       | 7.1 [6.6; 7.2]*       |
| 1st month                      | 8.6 [8.1; 8.8]       | 8.1 [7.7; 8.5]       | 8.2 [7.6; 8.4]       | 8.3 [8.0; 8.6]        |
| 2nd month                      | 7.6 [7.3; 8.2]       | 8.1 [7.1; 8.7]       | 8.1 [7.8; 8.4]       | 8.2 [7.8; 8.6]        |
| <b>HGB, g/l</b>                |                      |                      |                      |                       |
| Start                          | 165,5 [161,3; 170,5] | 171,5 [165,8; 175]   | 170,5 [167,5; 173,3] | 173 [157; 174]        |
| End of injection               | 173.0 [152.0; 184.0] | 167.0 [158.5; 181.5] | 162.5 [157.5; 164.0] | 135.5 [132.0; 140.8]* |
| 1st month                      | 163.0 [158.0; 172.0] | 170.0 [159.5; 182.5] | 167.0 [162.5; 177.3] | 169.0 [161.0; 175.0]  |
| 2nd month                      | 160.5 [149.5; 171.0] | 167.0 [150.5; 173.5] | 167.0 [154.5; 171.5] | 173.5 [167.8; 176.8]  |
| <b>HCT%</b>                    |                      |                      |                      |                       |
| Start                          | 38,9 [36,2; 39,8]    | 38,9 [38,1; 39,4]    | 38,9 [37,9; 40,4]    | 36,4 [35,5; 37,8]     |
| End of injection               | 39.6 [33.7; 40.7]    | 39.4 [36.4; 40.9]#   | 37.3 [35.6; 38.6]    | 31.2 [30.6; 33.4]*    |
| 1st month                      | 38.6 [36.5; 39.2]    | 38.5 [37.7; 40.9]    | 40.4 [37.9; 42.8]    | 38.6 [38.1; 39.4]     |
| 2nd month                      | 35.3 [33.1; 36.9]    | 37.6 [34.3; 40.4]    | 37.7 [35.3; 39.1]    | 37.86 [36.3; 38.5]    |
| <b>MCV, fl</b>                 |                      |                      |                      |                       |
| Start                          | 49,5 [46,5; 50]      | 48 [47,25; 49,5]     | 49 [47,75; 49,25]    | 46 [46; 49]           |
| End of injection               | 44.0 [42.5; 47.0]    | 48.0 [46.2; 50.0]##  | 47.5 [46.2; 48.7]    | 45.5 [44.7; 46.0]     |

|                                |                      |                       |                      |                        |
|--------------------------------|----------------------|-----------------------|----------------------|------------------------|
| <b>1st month</b>               | 45.0 [44.0; 47.0]    | 47.0 [47.0; 50.5]     | 50.0 [49.3; 51.3]    | 46.0 [45.5; 48.0]      |
| <b>2nd month</b>               | 45.0 [44.0; 45.0]    | 47.00 [45.00; 49.50]  | 46.0 [45.5; 48.0]    | 46.0 [45.0; 47.0]      |
| <b>MCH, pg</b>                 |                      |                       |                      |                        |
| <b>Start</b>                   | 21,2 [19,9; 21,8]    | 21 [20,7; 21,8]       | 21,15 [20,9; 21,7]   | 21,7 [21,1; 21,9]      |
| <b>End of injection</b>        | 19.5 [19.2;20.4]     | 20.9 [20.2; 21.5]##   | 20.6 [20.1; 21.1]    | 19.4 [19.1; 20.0]      |
| <b>1st month</b>               | 19.7 [19.4;20.1]     | 20.8 [20.4;21.7]      | 20.3 [19.8; 21.6]    | 20.4 [19.6; 20.9]      |
| <b>2nd month</b>               | 20.7 [20.3; 21.2]    | 20.7 [19.9; 21.0]     | 20.5 [20.1; 21.1]    | 21.3 [20.8; 21.7]      |
| <b>MCHC, g/l</b>               |                      |                       |                      |                        |
| <b>Start</b>                   | 427 [418,8; 441,5]   | 441 [435,5; 444,3]    | 436,5 [427,8; 449,3] | 457 [443; 478]         |
| <b>End of injection</b>        | 446.0 [432.0;452.5]  | 432.5 [424.0; 441.0]  | 433.0 [420.0; 446.5] | 432.0 [422.0; 439.5]   |
| <b>1st month</b>               | 439.0 [427.0;448.0]  | 432.0 [414.0; 447.0]  | 415.0 [395.3; 428.5] | 436.0 [417.5; 444.0]   |
| <b>2nd month</b>               | 460.5 [450.3; 470.8] | 438.0 [427.5;446.0]   | 443.0 [427.5;458.5]  | 463.0 [454.5; 474.5]   |
| <b>PLT, 10<sup>9</sup> g/l</b> |                      |                       |                      |                        |
| <b>Start</b>                   | 607[431,5; 639]      | 591,5[579; 604,8]     | 543 [396; 600,5]     | 580,5 [468,6; 614,7]   |
| <b>End of injection</b>        | 628.0 [529.0;771.0]  | 689.5 [469.3; 806.8]# | 788.0 [672.5;1011]   | 1044 [1011; 1235]*     |
| <b>1st month</b>               | 558.0 [506.5; 607.5] | 594.5 [548.5; 680.5]  | 742.0 [489.5; 842.5] | 621.0 [473.0; 736.0]   |
| <b>2nd month</b>               | 533.0 [514.3; 595.8] | 666.0 [642.5; 819.0]  | 639.5 [453.0; 850.0] | 725.5 [662.3; 796.0]** |

GR, granulocytes; HB, hemoglobin; HCT, hematocrit; LYM, lymphocytes; MCH, mean concentration hemoglobin; MCHC, mean corpuscular hemoglobin concentration; MCV, mean corpuscular volume; MI, monocytes; PLT, platelets; RBC, red blood cells; WBC, white blood cells. \* - compared to Control group; # - compared to NR/NR+DOX (\* - p<0.05, \*\* - p<0.01). Control, control group; DOX, doxorubicin group; NR+DOX, nicotinamide riboside+doxorubicin group - *Combined mode*; NR/NR+DOX, nicotinamide riboside/nicotinamide riboside+doxorubicin group - *Preventive mode*. Data are presented as Median [25%;75%].
