# Supplementary material for: Intravenous Nicotinamide Riboside Administration Has a Cardioprotective Effect in Chronic Doxorubicin-Induced Cardiomyopathy
Source: MDPI journal article supplement (doi:10.3390/ijms232113096), 2022-10-28
Supplement: s1 [file s1]

**Table S2.** Characteristics of the experimental groups.

| Group, n                      | Drugs                         | Administration route | Dose                   | Administration regimen                                                                                                                   | Cumulative dose       | Duration  |
|-------------------------------|-------------------------------|----------------------|------------------------|------------------------------------------------------------------------------------------------------------------------------------------|-----------------------|-----------|
| <b>Control<br/>(n = 15)</b>   | 0.9% sodium chloride solution | i.p.                 | 1 ml                   | 6 times every two days                                                                                                                   | 6 ml                  | 2.5 weeks |
| <b>DOX<br/>(n = 15)</b>       | doxorubicin                   | i.p.                 | 1,67 mg/kg             | 6 times every two days                                                                                                                   | 10 mg/kg              | 2.5 weeks |
| <b>NR+DOX<br/>(n = 15)</b>    | NR + doxorubicin              | i.v. + i.p.          | 300 mg/kg + 1,67 mg/kg | <i>Combined mode</i><br>6 times every two days:<br>i.v. NR → 30 min → i.p. doxorubicin                                                   | 1800 mg/kg + 10 mg/kg | 2.5 weeks |
| <b>NR/NR+DOX<br/>(n = 15)</b> | NR + doxorubicin              | i.v. + i.p.          | 300 mg/kg + 1,67 mg/kg | <i>Preventive mode</i><br>3 times every two days<br>i.v. NR → i.p. doxorubicin 6 times<br>alternating every other time with NR (3 times) | 1800 mg/kg + 10 mg/kg | 3.5 weeks |

DOX, doxorubicin; i.p., intraperitoneal administration; i.v., intravenous administration; NR, nicotinamide riboside. 10mg/kg of doxorubicin in rats is equivalent to 1.6mg/kg in humans (HED). 1800 mg/kg NR in rats is equivalent to 290.3 mg/kg in humans (HED).
